# Supplementary material for: Examining differences between overweight women and men in 12-month weight loss study comparing healthy low-carbohydrate vs. low-fat diets
Source: PubMed Central journal article supplement (PMC7752762; doi:10.1038/s41366-020-00708-y), 2020-11-14

### HLC-women

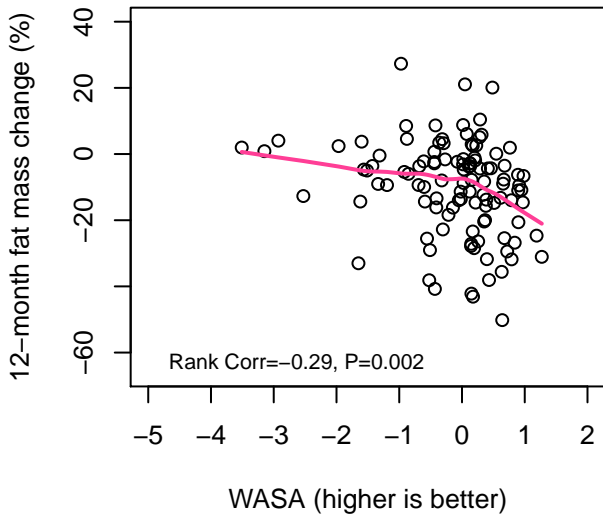

### HLC-men

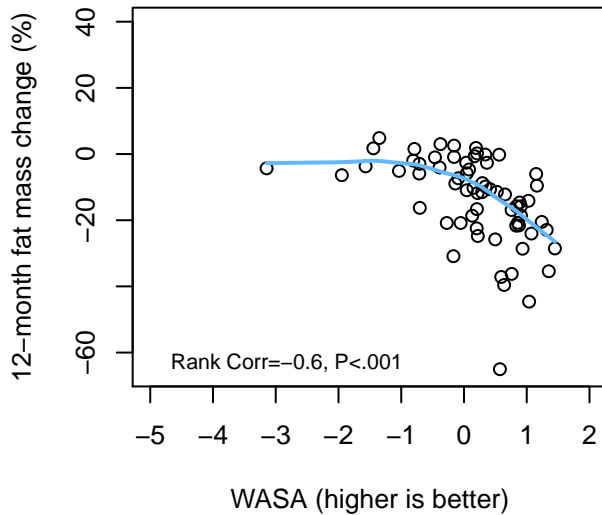

### HLF-women

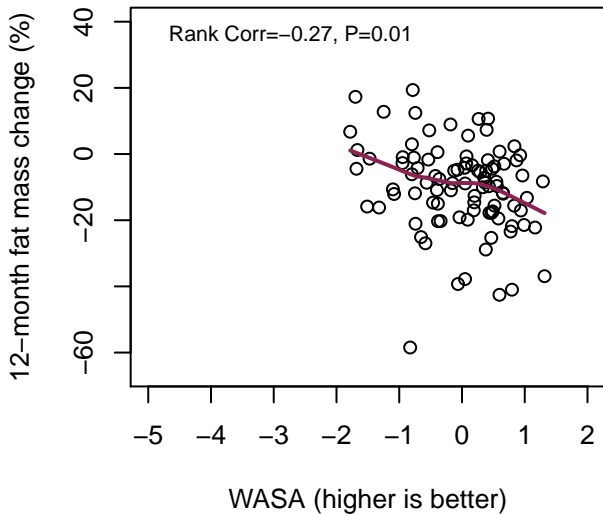

### HLF-men

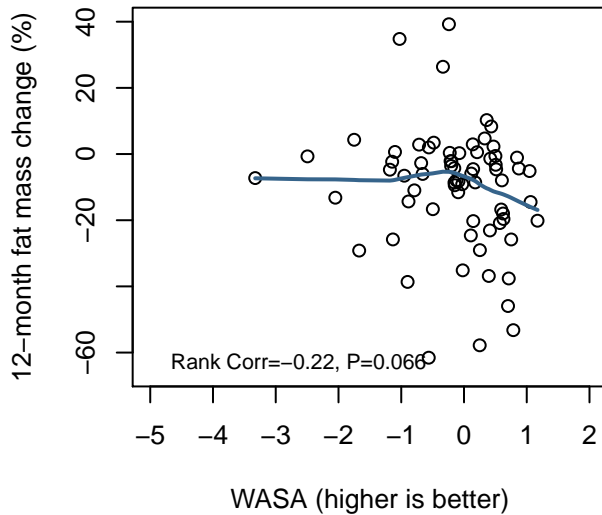

Supplement: 41366_2020_708_MOESM3_ESM.pdf [file 41366_2020_708_MOESM3_ESM.pdf]
